# Supplementary material for: One-pot hydrothermal synthesis of orientated delafossite CuFeO2 films from a mildly acidic solution on substrates
Source: Royal Society of Chemistry journal article supplement (doi:10.1039/d3tc01300f), 2023-01-01
Supplement: d3tc01300f1.pdf [file d3tc01300f1.pdf]

Supplementary Information

**One-pot hydrothermal synthesis of orientated delafossite  $\text{CuFeO}_2$  films  
from a mildly acidic solution on substrates**

Tsutomu Shinagawa,<sup>\*,a</sup> Wataru Tachibori,<sup>b</sup> Tomoya Nishii<sup>b</sup> and Atsushi Ohtaka<sup>b</sup>

<sup>a</sup> Electronic Materials Research Division, Morinomiya Center, Osaka Research Institute of Industrial Science and Technology (ORIST), Osaka 536-8553, Japan. \*E-mail: tshina@orist.jp

<sup>b</sup> Department of Applied Chemistry, Faculty of Engineering, Osaka Institute of Technology, Asahi, Osaka 535-8585, Japan.

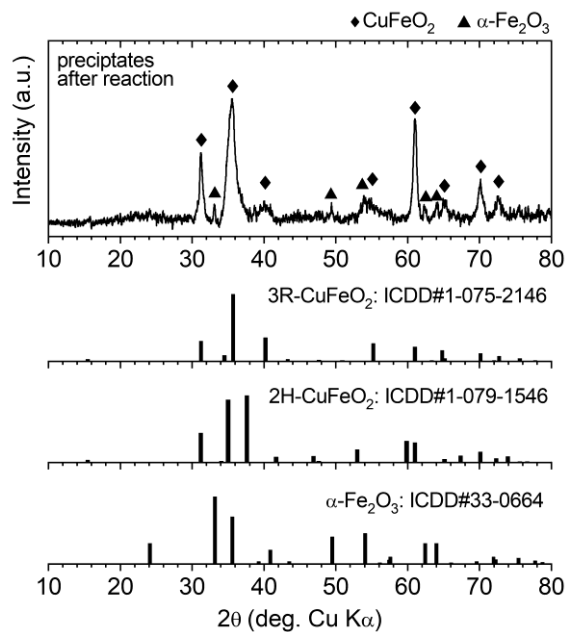

**Figure S1.** XRD pattern of black powder precipitated in a PTFE vessel after the hydrothermal reaction in  $\text{CuSO}_4\text{-FeSO}_4\text{-urea}$  (aq) at  $150^\circ\text{C}$  for 1 h. ICDD (no. 1-075-2146) for 3R- $\text{CuFeO}_2$ , (no. 1-079-1546) for 2H- $\text{CuFeO}_2$  and (no. 33-0664) for  $\alpha\text{-Fe}_2\text{O}_3$  are presented.

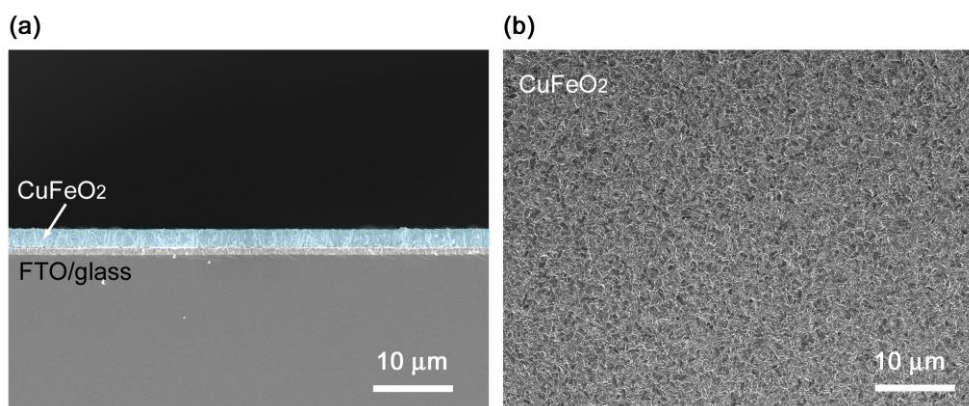

**Figure S2.** (a) Cross-sectional and (b) top-view FESEM images of the  $\text{CuFeO}_2$  film deposited on FTO glass substrates via the hydrothermal reaction in  $\text{CuSO}_4\text{-FeSO}_4\text{-urea}$  (aq) at  $150^\circ\text{C}$  for 1 h.

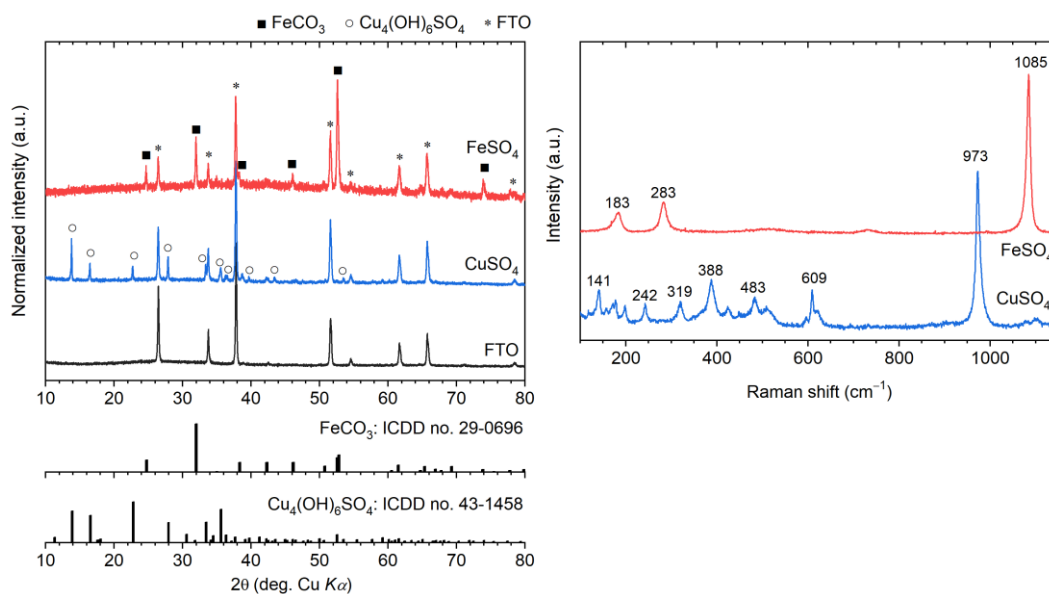

**Figure S3.** XRD patterns (left) and Raman spectra (right) of the films deposited on FTO glass substrates via the hydrothermal reaction in each  $\text{CuSO}_4$ -urea and  $\text{FeSO}_4$ -urea (aq) at  $150^\circ\text{C}$  for 1 h. ICDD (no. 29-0696) for  $\text{FeCO}_3$  and (no. 43-1458) for  $\text{Cu}_4(\text{OH})_6\text{SO}_4$  are presented.

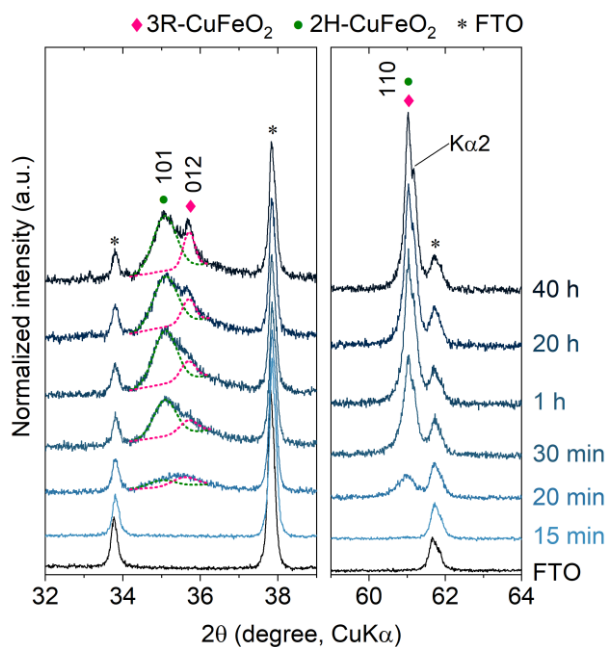

**Figure S4.** XRD patterns of the films deposited on FTO glass substrates via the hydrothermal reaction in  $\text{CuSO}_4$ - $\text{FeSO}_4$ -urea (aq) at  $150^\circ\text{C}$  at different reaction times (15 min–40 h).

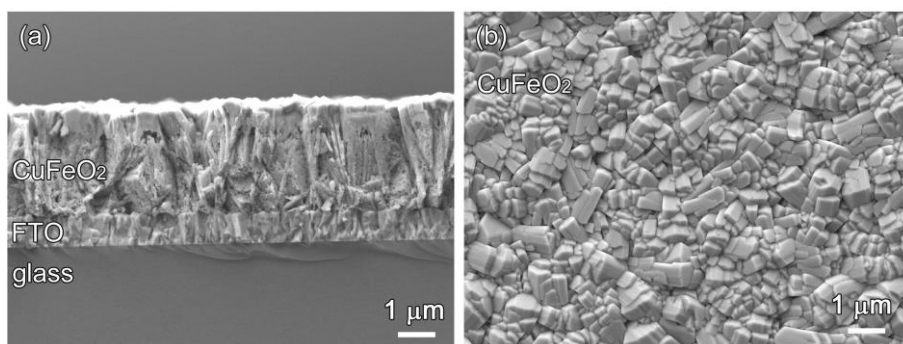

**Figure S5.** (a) cross-sectional and (b) top-view FESEM images of the  $\text{CuFeO}_2$  film deposited on FTO glass substrates via the hydrothermal reaction in  $\text{CuSO}_4\text{-FeSO}_4\text{-urea}$  (aq) at  $140^\circ\text{C}$  for 1 h.

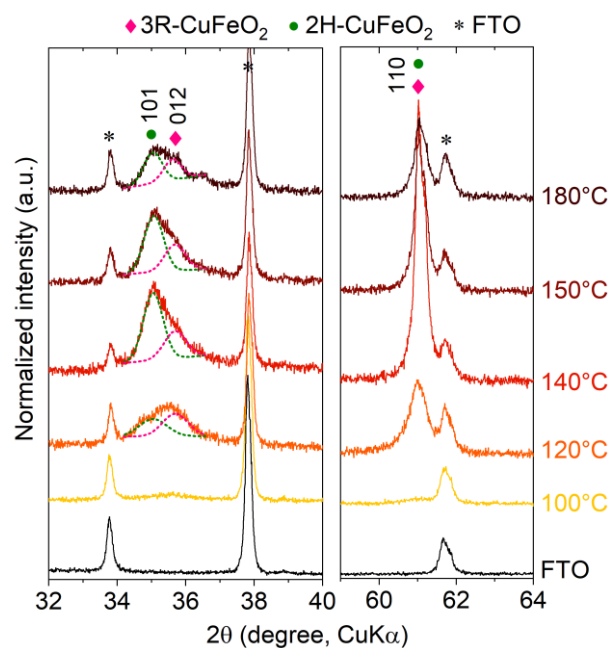

**Figure S6.** XRD patterns of the films deposited on FTO glass substrates via the hydrothermal reaction in  $\text{CuSO}_4\text{-FeSO}_4\text{-urea}$  (aq) for 1 h at different reaction temperatures ( $100^\circ\text{C}$ – $180^\circ\text{C}$ ).

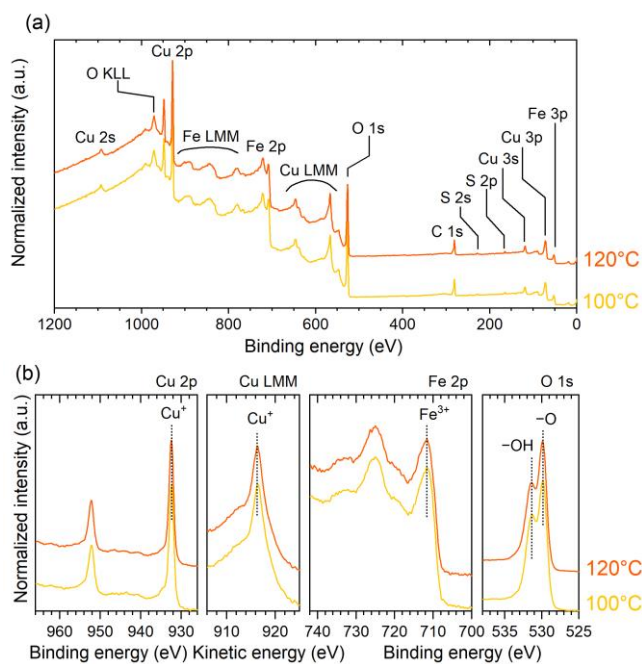

**Figure S7.** (a) wide-scan and (b) fine-scan XPS spectra of the films deposited on FTO glass substrates via the hydrothermal reaction in  $\text{CuSO}_4\text{-FeSO}_4\text{-urea (aq)}$  at  $100^\circ\text{C}$ – $120^\circ\text{C}$  for 1 h.

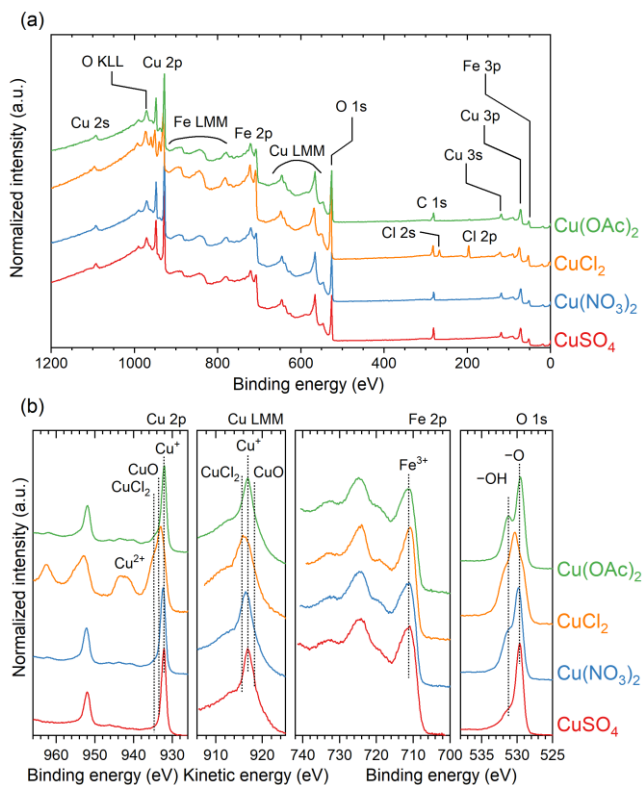

**Figure S8.** (a) wide-scan and (b) fine-scan XPS spectra of films deposited on FTO glass substrates by the hydrothermal reaction in each copper salt ( $\text{CuSO}_4$ ,  $\text{Cu(NO}_3)_2$ ,  $\text{CuCl}_2$  and  $\text{Cu(OAc)}_2$ )– $\text{FeSO}_4\text{-urea (aq)}$  at  $180^\circ\text{C}$  for 1 h.

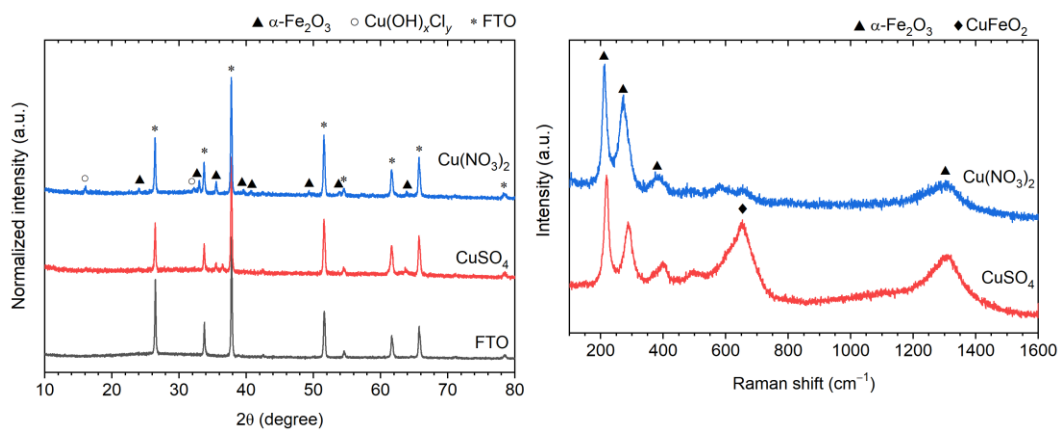

**Figure S9.** XRD patterns (left) and Raman spectra (right) of the films deposited on FTO glass substrates by the hydrothermal reaction in each copper salt ( $\text{CuSO}_4$  and  $\text{Cu}(\text{NO}_3)_2$ )– $\text{FeCl}_2$ –urea (aq) at  $180^\circ\text{C}$  for 1 h.
